# Supplementary material for: Trichoderma virens and Pseudomonas chlororaphis Differentially Regulate Maize Resistance to Anthracnose Leaf Blight and Insect Herbivores When Grown in Sterile versus Non-Sterile Soils
Source: MDPI journal article supplement (doi:10.3390/plants13091240), 2024-04-30
Supplement: s1 [file s1]

**Supplemental Table S1. List of metabolites of phytohormone and oxylipin profiling and the abbreviations**

| Compound      | Chemical/Common Name                                                                                      |
|---------------|-----------------------------------------------------------------------------------------------------------|
| 9-HOD         | 9( <i>S</i> )-hydroxy-10( <i>E</i> ),12( <i>Z</i> )-octadecadienoic acid                                  |
| 9-HOT         | 9( <i>S</i> )-hydroxy-10( <i>E</i> ),12( <i>Z</i> ),15( <i>Z</i> )-octadecatrienoic acid                  |
| 9,10-EpOM     | cis-9,10-epoxy-12( <i>Z</i> )-octadecenoic acid / Coronaric acid                                          |
| 9,10-EpOD     | cis-9,10-epoxy-12( <i>Z</i> ),15( <i>Z</i> )-octadecadienoic acid                                         |
| 9,10-diHOM    | threo-9,10-dihydroxy-12( <i>Z</i> )-octadecenoic acid                                                     |
| 9-KOD         | 9( <i>S</i> )-oxo-10( <i>E</i> ),12( <i>Z</i> )-octadecadienoic acid                                      |
| 9-KOT         | 9( <i>S</i> )-oxo-10( <i>E</i> ),12( <i>Z</i> ),15( <i>Z</i> )-octadecatrienoic acid                      |
| 9,10-KOMA     | 9-hydroxy-10-oxo-12( <i>Z</i> )-octadecenoic acid                                                         |
| 9,10-KODA     | 9-hydroxy-10-oxo-12( <i>Z</i> ),15( <i>Z</i> )-octadecadienoic acid                                       |
| 13,10-KOMA    | 13-hydroxy-10-oxo-11( <i>E</i> )-octadecenoic acid                                                        |
| 13,10-KODA    | 13-hydroxy-10-oxo-11( <i>E</i> ),15( <i>Z</i> )-octadecadienoic acid                                      |
| 10-OPDA       | 10-oxo-11( <i>Z</i> ),15( <i>Z</i> )-phytodienoic acid                                                    |
| 9,12,13-THOM  | 9( <i>S</i> ),12( <i>S</i> ),13( <i>S</i> )-trihydroxy-10( <i>E</i> )-octadecenoic acid                   |
| 9,12,13-THOD  | 9( <i>S</i> ),12( <i>S</i> ),13( <i>S</i> )-trihydroxy-10( <i>E</i> ),15( <i>Z</i> )-octadecadienoic acid |
| 9,10,11-THOM  | 9( <i>S</i> ),10( <i>S</i> ),11( <i>R</i> )-trihydroxy-12( <i>Z</i> )-octadecenoic acid                   |
| 9,10,11-THOD  | 9( <i>S</i> ),10( <i>S</i> ),11( <i>R</i> )-trihydroxy-12( <i>Z</i> ),15( <i>Z</i> )-octadecadienoic acid |
| AZA           | nonanedicarboxylic acid / azelaic acid                                                                    |
| 13-HOD        | 13( <i>S</i> )-hydroxy-9( <i>Z</i> ),11( <i>E</i> )-octadecadienoic acid                                  |
| 13-HOT        | 13( <i>S</i> )-hydroxy-9( <i>Z</i> ),11( <i>E</i> ),15( <i>Z</i> )-octadecatrienoic acid                  |
| 12,13-EpOM    | cis-12,13-epoxy-9( <i>Z</i> )-octadecanoic acid                                                           |
| 12,13-EpOD    | cis-12,13-epoxy-9( <i>Z</i> ),15( <i>Z</i> )-octadecadienoic acid                                         |
| 12,13-diHOME  | threo-12,13-dihydroxy-9( <i>Z</i> )-octadecenoic acid                                                     |
| 13-KOD        | 13-oxo-9( <i>Z</i> ),11( <i>E</i> )-octadecadienoic acid                                                  |
| 13-KOT        | 13-oxo-9( <i>Z</i> ),11( <i>E</i> ),15( <i>Z</i> )-octadecatrienoic acid                                  |
| OTD           | 13-oxo-9( <i>Z</i> ),11( <i>E</i> )-tridecadienoic acid                                                   |
| TDD           | 9( <i>Z</i> ),11( <i>E</i> )-tridecadiendioic acid                                                        |
| 9,12-KOMA     | 9-hydroxy-12-oxo-10( <i>E</i> )-octadecenoic acid                                                         |
| 9,12-KODA     | 9-hydroxy-12-oxo-10( <i>E</i> ),15( <i>Z</i> )-octadecadienoic acid                                       |
| 13,12-KOMA    | 13-hydroxy-12-oxo-9( <i>Z</i> )-octadecenoic acid                                                         |
| 13,12-KODA    | 13-hydroxy-12-oxo-9( <i>Z</i> ),15( <i>Z</i> )-octadecadienoic acid                                       |
| 12-OPDA       | 12-oxo-10( <i>Z</i> ),15( <i>Z</i> )-phytodienoic acid                                                    |
| dn12-OPDA     | dinor-12-oxo-10( <i>Z</i> ),15( <i>Z</i> )-phytodienoic acid                                              |
| OPC-4:0       | ( <i>Z</i> )-4-[3-oxo-2-(pent-2-en-1-yl)cyclopentyl]butanoic acid                                         |
| JA            | (+)-7-iso-jasmonic acid                                                                                   |
| JA-Val        | (+)-7-iso-jasmonic acid valine                                                                            |
| JA-Leu        | (+)-7-iso-jasmonic acid luecine                                                                           |
| JA-Ile        | (+)-7-iso-jasmonic acid isoluecine                                                                        |
| 12OH-JA       | 12-hydroxy-jasmonic acid                                                                                  |
| 12OH-JA-Ile   | 12-hydroxy-jasmonic acid isoluecine                                                                       |
| 12COOH-JA-Ile | 12-carboxy-jasmonic acid                                                                                  |
| CCA           | curcubic Acid                                                                                             |
| DH-JA         | 9,10-dihydro-jasmonic acid                                                                                |
| 9,10,13-THOM  | 9( <i>S</i> ),10( <i>S</i> ),13( <i>S</i> )-trihydroxy-11( <i>E</i> )-octadecenoic acid                   |
| 9,10,13-THOD  | 9( <i>S</i> ),10( <i>S</i> ),13( <i>S</i> )-trihydroxy-11( <i>E</i> ),15( <i>Z</i> )-octadecadienoic acid |
| 9OH-TAN       | 9-hydroxy-12-oxo-10( <i>E</i> )-dodecenoic acid / 9-hydroxy-traumatin                                     |
| 9Z-TAN        | 12-oxo-9( <i>Z</i> )-dodecenoic acid                                                                      |
| TA            | 2( <i>E</i> )-dodecenedioic acid / Traumatic acid                                                         |
| TAN           | 12-oxo-10( <i>E</i> )-dodecenoic acid / Traumatin                                                         |
| 2OH-PA        | 2-hydroxy-hexadecanoic acid / 2-hydroxy-palmitic acid                                                     |
| 10-HOD        | 10-hydroxy-8( <i>E</i> ),12( <i>Z</i> )-octadecadienoic acid                                              |

|       |                                                 |
|-------|-------------------------------------------------|
| 2-HOT | 2-hydroxy-9(Z),12(Z),15(Z)-octadecadienoic acid |
| CA    | trans-cinnamic acid                             |
| COUMA | coumaric acid                                   |
| BA    | benzoic acid                                    |
| SA    | salicylic acid                                  |
| ABA   | abscisic acid                                   |
